# Supplementary material for: Enhanced stability of vanadium-doped Li1.2Ni0.16Co0.08Mn0.56O2 cathode materials for superior Li-ion batteries
Source: Royal Society of Chemistry journal article supplement (doi:10.1039/d2ra05126e), 2022-01-01
Supplement: d2ra05126e1.pdf [file d2ra05126e1.pdf]

## Supporting Information

### **Enhanced stability of Vanadium-doped $\text{Li}_{1.2}\text{Ni}_{0.16}\text{Co}_{0.08}\text{Mn}_{0.56}\text{O}_2$ cathode materials for superior Li-ion batteries**

Miaomiao Zhou <sup>a,†</sup>, Jianjun Zhao <sup>b,†</sup>, Xiaodong Wang <sup>a,†</sup>, Ji Shen <sup>a</sup>, Jin-Lin Yang <sup>c,d</sup>, Wenhao Tang <sup>a</sup>, Yirui Deng <sup>a</sup>, Shi-Xi Zhao <sup>c,\*</sup>, Ruiping Liu <sup>a,\*</sup>

<sup>a</sup> School of Chemical & Environmental Engineering, China University of Mining and Technology (Beijing), Beijing 100083, PR China.

<sup>b</sup> State Key Laboratory of Chemical Resources Engineering, Beijing Advanced Innovation Center for Soft Matter Science and Engineering, College of Chemistry, Beijing University of Chemical Technology, Beijing 100029, China.

<sup>c</sup> Tsinghua Shenzhen International Graduate School, Tsinghua University, Shenzhen, 518055, China.

<sup>d</sup> School of Materials Science and Engineering, Tsinghua University, Beijing, 100084, China.

**Table S1.** Lattice parameters of pristine, V-0.5%,V-0.2%, V-1%,V-2% and V-5% samples.

| Samples  | a(Å)   | c(Å)    | c/a    | V (Å <sup>3</sup> ) | $I_{(003)}/I_{(104)}$ |
|----------|--------|---------|--------|---------------------|-----------------------|
| Pristine | 2.8751 | 14.2475 | 4.9554 | 101.99              | 1.323                 |
| V-0.5%   | 2.8715 | 14.2674 | 4.9686 | 101.88              | 1.390                 |
| V-1%     | 2.8546 | 14.2691 | 4.9986 | 100.74              | 1.417                 |
| V-2%     | 2.8549 | 14.2659 | 4.9969 | 100.75              | 1.319                 |
| V-5%     | 2.8863 | 14.2052 | 4.9215 | 102.48              | 1.271                 |

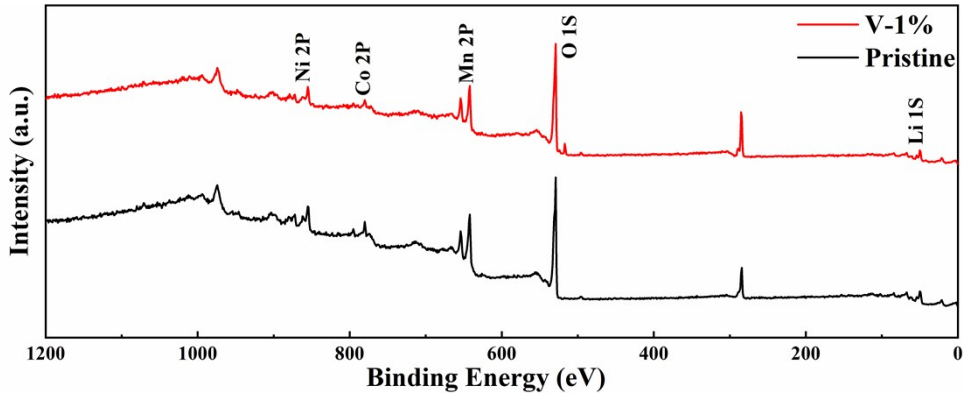**Fig. S1.** XPS images for the pristine and V-1% samples.**Table S2.** Percentage of Mn<sup>3+</sup> ions in the pristine material and V-1%.

| Pristine               | Position | Area     | V-1%                   | Position | Area     |
|------------------------|----------|----------|------------------------|----------|----------|
| Mn <sup>4+</sup>       | 642.68   | 86566.36 | Mn <sup>4+</sup>       | 642.67   | 48367.46 |
| Mn <sup>3+</sup>       | 641.49   | 20474.39 | Mn <sup>3+</sup>       | 641.51   | 22423.2  |
| Mn <sup>3+</sup> in Mn |          | 19.12%   | Mn <sup>3+</sup> in Mn |          | 31.67%   |

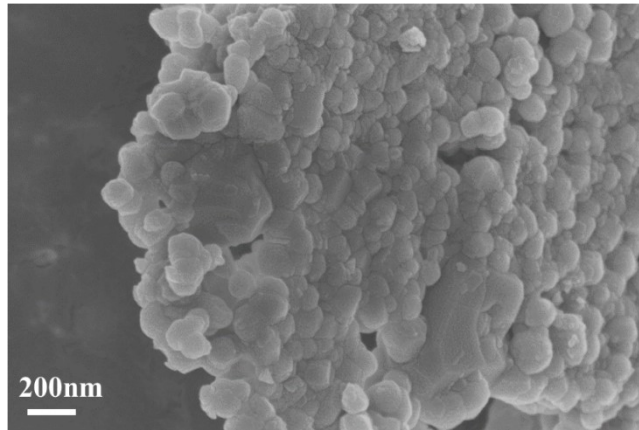

**Fig. S2.** SEM images of V-5% sample.

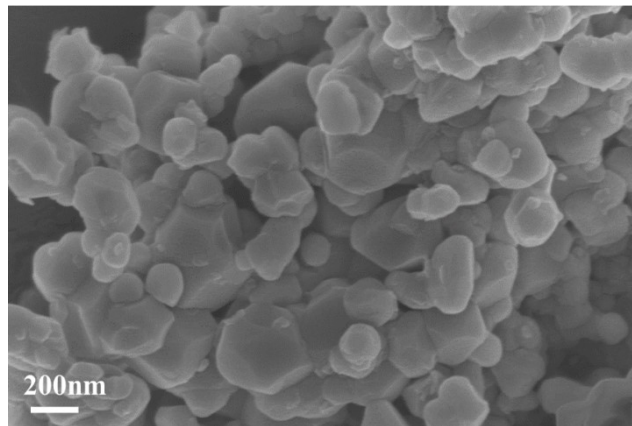

**Fig. S3.** SEM images of V-0.05% sample.

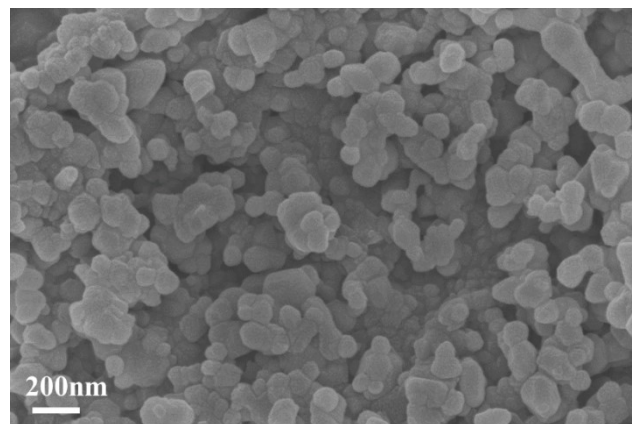

**Fig. S4.** SEM images of V-2% sample

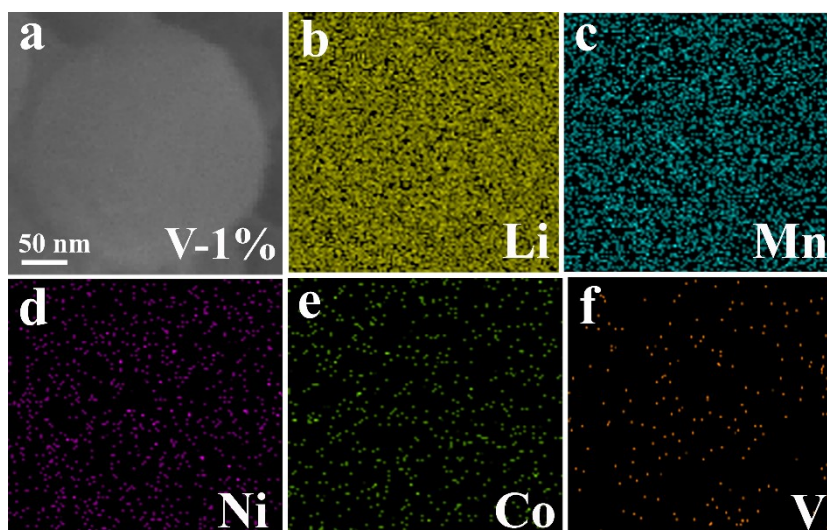

**Fig. S5.** SEM images of V-1% (a); EDS-mapping of Li (b), Mn (c), Ni (d), Co (e), and V (f).

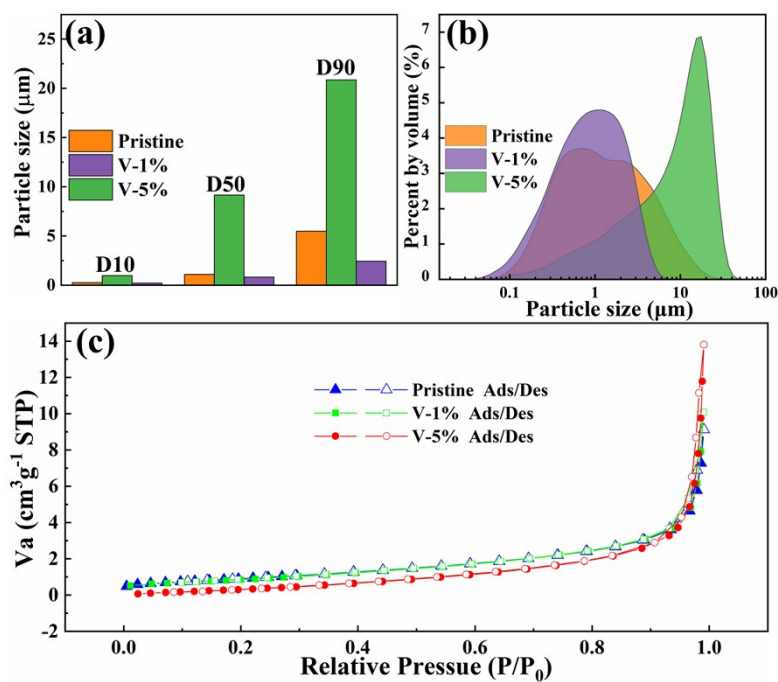

**Fig. S6.** (a, b) Secondary particle size distribution of the pristine, V-1%, and V-5% samples, D90, D50 and D10 are the equivalent diameters (average particle size) of the largest particles in the distribution curve at a cumulative distribution of 90%, 50% and 10%, respectively. (c) Nitrogen adsorption and desorption isotherms of the pristine, V-1%, and V-5% samples.

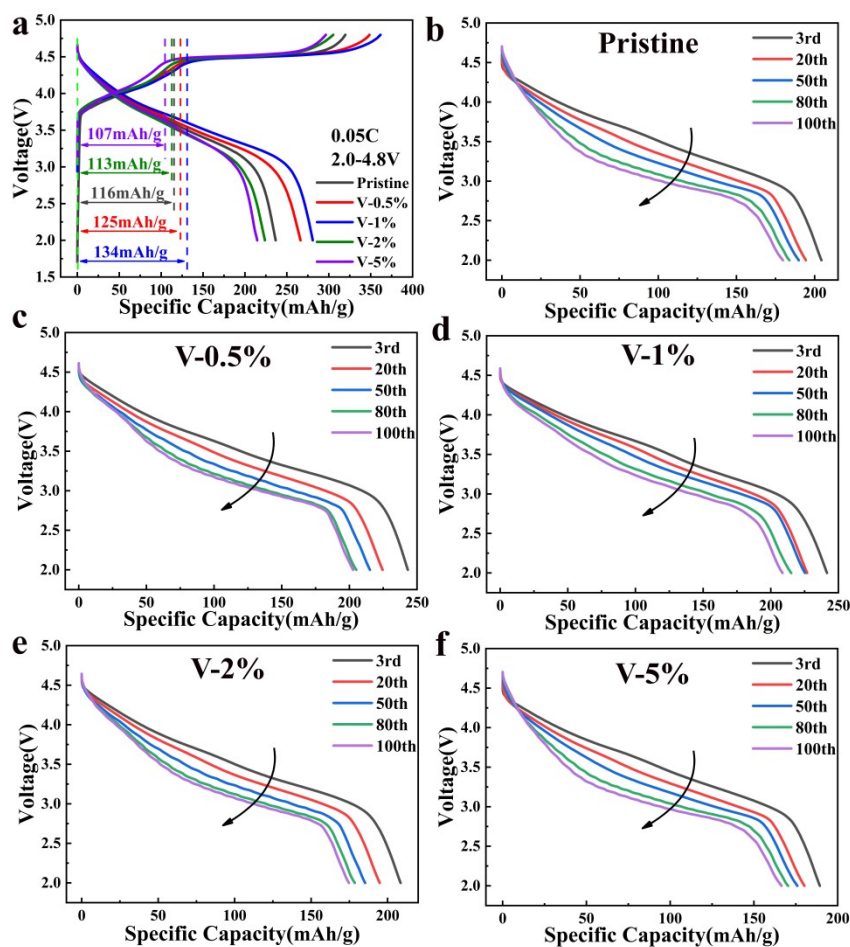

**Fig. S7.** Initial galvanostatic charge/discharge profiles of the pristine, V-0.5%, V-1%, V-2%, and V-5% samples at the current density of 0.05 C ( $1\text{ C} = 250\text{ mA g}^{-1}$ ) between 2.0 and 4.8 V (a); the charge/discharge curves of pristine, V-0.5%, V-1%, V-2%, and V-5% samples (b-f).

**Table S3.** Initial charge/discharge data for the pristine, V-0.5%, V-1%, V-2% and V-5% electrodes at the current density of 0.05 C between 2.0 and 4.8 V.

| Sample   | Charge capacity ( $\text{mA}\cdot\text{g}^{-1}$ ) | Discharge capacity ( $\text{mAh}\cdot\text{g}^{-1}$ ) | Sloping area ( $\text{mAh}\cdot\text{g}^{-1}$ ) | Platform area ( $\text{mAh}\cdot\text{g}^{-1}$ ) | Coulomb efficiency (%) |
|----------|---------------------------------------------------|-------------------------------------------------------|-------------------------------------------------|--------------------------------------------------|------------------------|
| Pristine | 319.72                                            | 236.63                                                | 116.54                                          | 203.18                                           | 74.01                  |
| V-0.05%  | 348.63                                            | 266.25                                                | 125.12                                          | 223.51                                           | 76.37                  |
| V-1%     | 361.65                                            | 280.91                                                | 134.26                                          | 227.39                                           | 77.67                  |
| V-2%     | 305.21                                            | 223.81                                                | 113.67                                          | 191.54                                           | 73.33                  |
| V-5%     | 296.55                                            | 214.69                                                | 107.99                                          | 188.56                                           | 72.40                  |

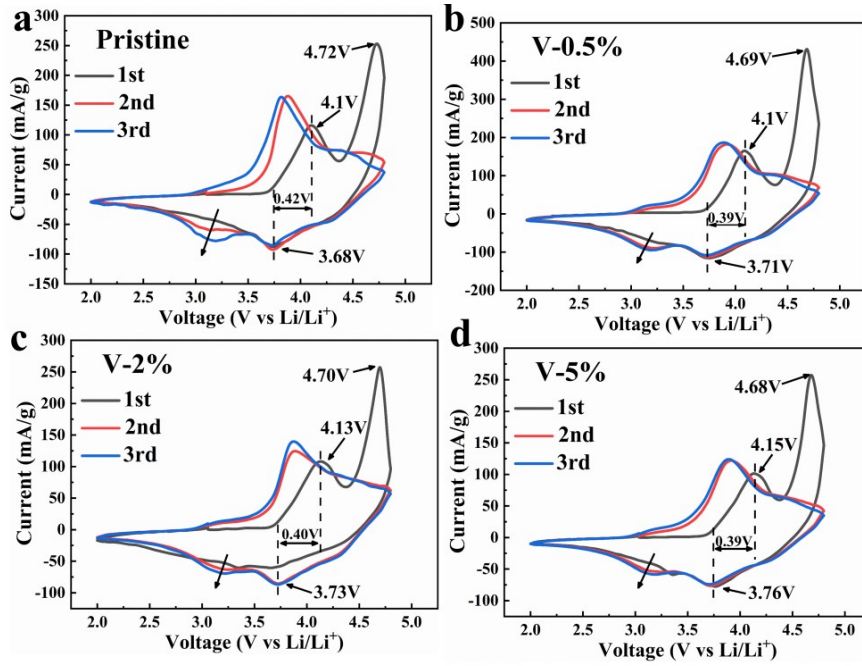

**Fig. S8.** Cyclic voltammetry curves of the pristine, V-0.5%, , V-2%, and V-5% (a-d) samples at  $0.1 \text{ mV} \cdot \text{s}^{-1}$ .

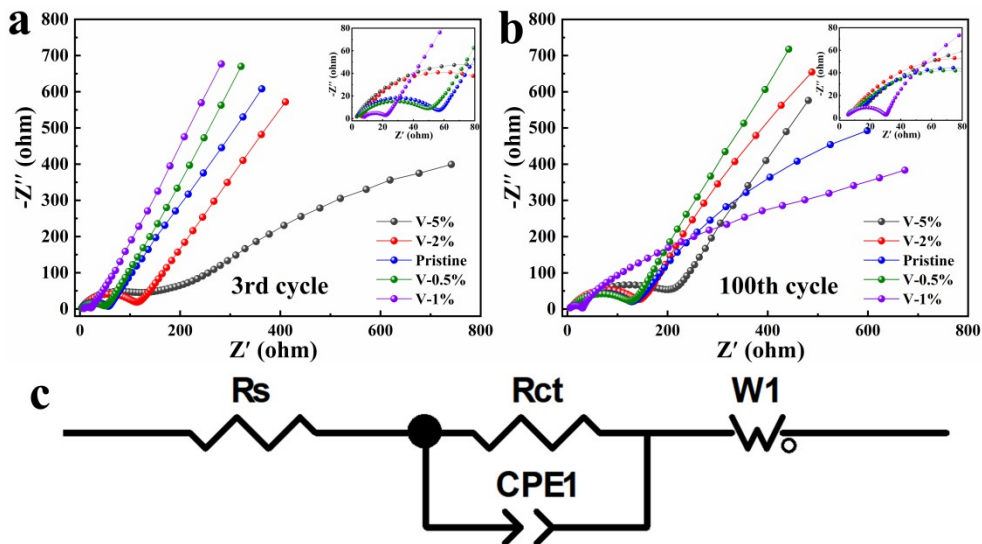

**Fig. S9.** Nyquist plots of pristine, V-0.5%, V-1%, V-2%, and V-2% samples for the 3rd cycle (a); Nyquist plots of pristine, V-0.5%, V-1%, V-2%, and V-2% samples for the 100th cycle (b).

**Table S4** The Impedance data for the pristine, V-0.5%, V-1%, V-2% and V-2% electrodes for the 3<sup>rd</sup> and 100<sup>th</sup> cycles.

| <b>Samples</b> | <b><math>R_{ct}</math> (<math>\Omega</math>, 3<sup>rd</sup> cycle)</b> | <b><math>R_{ct}</math> (<math>\Omega</math>, 100<sup>th</sup> cycle)</b> | <b><math>R_s</math> (<math>\Omega</math>, 3<sup>rd</sup> cycle)</b> | <b><math>R_s</math> (<math>\Omega</math>, 3<sup>rd</sup> cycle)</b> |
|----------------|------------------------------------------------------------------------|--------------------------------------------------------------------------|---------------------------------------------------------------------|---------------------------------------------------------------------|
| Pristine       | 49.85                                                                  | 106.90                                                                   | 2.85                                                                | 10.54                                                               |
| V-0.5%         | 45.15                                                                  | 116.00                                                                   | 3.33                                                                | 5.77                                                                |
| V-1%           | 14.61                                                                  | 20.72                                                                    | 6.98                                                                | 4.50                                                                |
| V-2%           | 105.9                                                                  | 126.8                                                                    | 6.28                                                                | 4.50                                                                |
| V-5%           | 113.5                                                                  | 205.4                                                                    | 1.07                                                                | 10.20                                                               |

**Table S5** Lattice parameters of pristine, V-1% and V-5% samples after cycles.

| <b>Samples</b> | <b>I(003)/I(104)</b> |
|----------------|----------------------|
| Pristine       | 1.392                |
| V-1%           | 1.401                |
| V-5%           | 0.880                |
